# Supplementary material for: Self Containment, a Property of Modular RNA Structures, Distinguishes microRNAs
Source: PLOS journal article supplement (doi:10.1371/journal.pcbi.1000150), 2008-08-21
Supplement: S1 (10.1371/journal.pcbi.1000150.s001) [file journal.pcbi.1000150.s001]

Table S1. Effects of Varying the Number of Random Contexts Used to Calculate the Self-containment Index

| # Contexts Used | RNA   | Slope <sup>a</sup> | $r^2$ <sup>b</sup> |
|-----------------|-------|--------------------|--------------------|
| 100             | miRNA | 1.00               | 0.98               |
|                 | rand  | 0.97               | 0.98               |
| 5000            | miRNA | 1.00               | 1.00               |
|                 | rand  | 0.99               | 0.99               |

<sup>a</sup>Slope of the linear regression line for the modified score as a function of the normal formulation of SC (using 1000 random contexts).

<sup>b</sup>Correlation coefficient between the modified score and the normal formulation of SC.
