# Supplementary material for: Self Containment, a Property of Modular RNA Structures, Distinguishes microRNAs
Source: PLOS journal article supplement (doi:10.1371/journal.pcbi.1000150), 2008-08-21
Supplement: S3 (10.1371/journal.pcbi.1000150.s003) [file journal.pcbi.1000150.s003]

Table S3. Effects of Varying the Source of the Random Contexts Used to Calculate the Self-containment Index

| context source  | RNA   | slope <sup>a</sup> | r <sup>2</sup> <sup>b</sup> |
|-----------------|-------|--------------------|-----------------------------|
| coding sequence | miRNA | 1.04               | 0.98                        |
|                 | rand  | 1.02               | 0.98                        |
| intron          | miRNA | 0.92               | 0.97                        |
|                 | rand  | 0.99               | 0.96                        |
| shuffled coding | miRNA | 1.01               | 0.98                        |
|                 | rand  | 1.01               | 0.98                        |
| shuffled intron | miRNA | 0.89               | 0.96                        |
|                 | rand  | 0.99               | 0.96                        |

<sup>a</sup>Slope of the linear regression line for the modified score as a function of the normal formulation of SC (using random contexts).

<sup>b</sup>Correlation coefficient between the modified score and the normal formulation of SC.
